# Supplementary material
Source: bioRxiv or medRxiv preprint supplement (https://medrxiv.org/highwire/filestream/92056/field_highwire_adjunct_files/1/2020.08.03.20167189-2.pdf)
Supplement: Supplementary file [file 2020.08.03.20167189-2.pdf]

| <b>Country</b>               | <b>ADF<sup>1</sup></b> | <b>PP<sup>2</sup></b> |
|------------------------------|------------------------|-----------------------|
| Afghanistan                  | 1.00                   | 1.00                  |
| Albania                      | 0.83                   | 0.70                  |
| Algeria                      | 0.15                   | 0.61                  |
| Andorra                      | 1.00                   | 1.00                  |
| Antigua and Barbuda          | 0.98                   | 0.98                  |
| Argentina                    | 1.00                   | 1.00                  |
| Armenia                      | 1.00                   | 1.00                  |
| Aruba                        | 0.99                   | 0.99                  |
| Australia                    | 0.96                   | 0.91                  |
| Austria                      | 1.00                   | 0.99                  |
| Azerbaijan                   | 1.00                   | 1.00                  |
| Bahamas                      | 1.00                   | 1.00                  |
| Bahrain                      | 1.00                   | 1.00                  |
| Bangladesh                   | 1.00                   | 1.00                  |
| Barbados                     | 0.77                   | 0.75                  |
| Belarus                      | 0.98                   | 0.98                  |
| Belgium                      | 0.10                   | 0.54                  |
| Bermuda                      | 0.95                   | 0.97                  |
| Bhutan                       | 1.00                   | 1.00                  |
| Bolivia                      | 1.00                   | 1.00                  |
| Bosnia and Herzegovina       | 0.44                   | 0.48                  |
| Brazil                       | 1.00                   | 1.00                  |
| Brunei                       | 0.00                   | 0.00                  |
| Bulgaria                     | 0.09                   | 0.26                  |
| Burkina Faso                 | 0.99                   | 0.99                  |
| Cambodia                     | 0.98                   | 0.94                  |
| Cameroon                     | 1.00                   | 1.00                  |
| Canada                       | 0.23                   | 0.79                  |
| Cape Verde                   | 0.63                   | 0.65                  |
| Cayman Islands               | 0.86                   | 0.85                  |
| Central African Republic     | 1.00                   | 1.00                  |
| Chad                         | 0.98                   | 0.98                  |
| Chile                        | 1.00                   | 1.00                  |
| China                        | 1.00                   | 0.99                  |
| Colombia                     | 1.00                   | 1.00                  |
| Congo                        | 0.92                   | 0.95                  |
| Costa Rica                   | 0.98                   | 0.95                  |
| Cote d'Ivoire                | 0.35                   | 0.35                  |
| Croatia                      | 1.00                   | 0.99                  |
| Cuba                         | 0.97                   | 0.93                  |
| Curacao                      | 0.68                   | 0.68                  |
| Cyprus                       | 1.00                   | 1.00                  |
| Czech Republic               | 1.00                   | 0.99                  |
| Democratic Republic of Congo | 1.00                   | 1.00                  |
| Denmark                      | 0.98                   | 0.93                  |
| Djibouti                     | 1.00                   | 1.00                  |
| Dominican Republic           | 0.88                   | 0.84                  |
| Ecuador                      | 0.57                   | 0.56                  |
| Egypt                        | 1.00                   | 1.00                  |
| El Salvador                  | 1.00                   | 1.00                  |

---

<sup>1</sup> Augmented Dickey-Fuller unit root test.

<sup>2</sup> Phillips-Perron unit root test.

|                   |      |      |
|-------------------|------|------|
| Equatorial Guinea | 0.99 | 1.00 |
| Estonia           | 1.00 | 0.99 |
| Ethiopia          | 1.00 | 1.00 |
| Faeroe Islands    | 0.00 | 0.00 |
| Finland           | 0.00 | 0.11 |
| France            | 0.26 | 0.63 |
| French Polynesia  | 0.01 | 0.00 |
| Gabon             | 1.00 | 1.00 |
| Gambia            | 0.46 | 0.43 |
| Georgia           | 0.20 | 0.33 |
| Germany           | 0.43 | 0.72 |
| Ghana             | 0.96 | 0.96 |
| Gibraltar         | 0.53 | 0.58 |
| Greece            | 1.00 | 1.00 |
| Greenland         | 0.08 | 0.12 |
| Guam              | 0.25 | 0.31 |
| Guatemala         | 1.00 | 1.00 |
| Guernsey          | 0.98 | 0.97 |
| Guinea            | 0.54 | 0.37 |
| Guyana            | 0.18 | 0.20 |
| Haiti             | 1.00 | 1.00 |
| Honduras          | 1.00 | 1.00 |
| Hungary           | 0.83 | 0.79 |
| Iceland           | 1.00 | 1.00 |
| India             | 1.00 | 1.00 |
| Indonesia         | 1.00 | 1.00 |
| Iran              | 0.01 | 0.17 |
| Iraq              | 1.00 | 1.00 |
| Ireland           | 0.94 | 0.90 |
| Isle of Man       | 0.99 | 0.99 |
| Israel            | 0.99 | 0.98 |
| Italy             | 0.52 | 0.75 |
| Jamaica           | 0.78 | 0.77 |
| Japan             | 0.42 | 0.74 |
| Jersey            | 0.99 | 0.99 |
| Jordan            | 0.93 | 0.81 |
| Kazakhstan        | 1.00 | 1.00 |
| Kenya             | 1.00 | 1.00 |
| Kosovo            | 0.99 | 0.97 |
| Kuwait            | 1.00 | 1.00 |
| Kyrgyzstan        | 1.00 | 1.00 |
| Latvia            | 1.00 | 1.00 |
| Lebanon           | 0.87 | 0.73 |
| Liberia           | 0.10 | 0.09 |
| Liechtenstein     | 0.98 | 0.97 |
| Lithuania         | 0.99 | 0.98 |
| Luxembourg        | 1.00 | 1.00 |
| Macedonia         | 0.07 | 0.22 |
| Madagascar        | 1.00 | 1.00 |
| Malaysia          | 0.02 | 0.37 |
| Maldives          | 1.00 | 1.00 |
| Malta             | 0.99 | 0.98 |
| Mauritania        | 1.00 | 1.00 |
| Mauritius         | 0.63 | 0.74 |
| Mexico            | 1.00 | 1.00 |

|                                  |      |      |
|----------------------------------|------|------|
| Moldova                          | 0.06 | 0.17 |
| Monaco                           | 1.00 | 0.99 |
| Mongolia                         | 0.96 | 0.95 |
| Montenegro                       | 0.98 | 0.97 |
| Montserrat                       | 0.74 | 0.80 |
| Morocco                          | 0.01 | 0.13 |
| Myanmar                          | 0.87 | 0.78 |
| Namibia                          | 0.87 | 0.83 |
| Nepal                            | 1.00 | 1.00 |
| Netherlands                      | 1.00 | 0.98 |
| New Caledonia                    | 0.00 | 0.00 |
| New Zealand                      | 0.99 | 0.98 |
| Nicaragua                        | 0.99 | 0.99 |
| Niger                            | 1.00 | 0.99 |
| Nigeria                          | 1.00 | 1.00 |
| Norway                           | 1.00 | 1.00 |
| Oman                             | 1.00 | 1.00 |
| Pakistan                         | 1.00 | 1.00 |
| Palestine                        | 0.68 | 0.62 |
| Panama                           | 0.89 | 0.88 |
| Paraguay                         | 0.88 | 0.84 |
| Peru                             | 1.00 | 1.00 |
| Philippines                      | 1.00 | 1.00 |
| Poland                           | 0.00 | 0.00 |
| Portugal                         | 0.97 | 0.93 |
| Qatar                            | 1.00 | 1.00 |
| Romania                          | 0.00 | 0.03 |
| Russia                           | 1.00 | 1.00 |
| Rwanda                           | 0.71 | 0.52 |
| Saint Lucia                      | 0.95 | 0.91 |
| Saint Vincent and the Grenadines | 0.58 | 0.51 |
| San Marino                       | 1.00 | 1.00 |
| Saudi Arabia                     | 1.00 | 1.00 |
| Senegal                          | 1.00 | 1.00 |
| Serbia                           | 0.99 | 0.96 |
| Seychelles                       | 0.00 | 0.00 |
| Singapore                        | 1.00 | 1.00 |
| Sint Maarten (Dutch part)        | 0.99 | 0.98 |
| Slovakia                         | 1.00 | 1.00 |
| Slovenia                         | 1.00 | 1.00 |
| Somalia                          | 0.78 | 0.78 |
| South Africa                     | 1.00 | 1.00 |
| South Korea                      | 1.00 | 0.99 |
| Spain                            | 0.82 | 0.84 |
| Sri Lanka                        | 1.00 | 1.00 |
| Sudan                            | 1.00 | 1.00 |
| Suriname                         | 0.98 | 0.92 |
| Swaziland                        | 0.87 | 0.87 |
| Sweden                           | 0.31 | 0.73 |
| Switzerland                      | 1.00 | 1.00 |
| Taiwan                           | 0.98 | 0.94 |
| Tanzania                         | 0.91 | 0.89 |
| Thailand                         | 0.83 | 0.84 |
| Togo                             | 1.00 | 1.00 |
| Trinidad and Tobago              | 0.75 | 0.75 |

|            |      |      |
|------------|------|------|
| Tunisia    | 1.00 | 1.00 |
| Turkey     | 0.97 | 0.92 |
| UAE        | 1.00 | 1.00 |
| UK         | 0.03 | 0.53 |
| USA        | 0.42 | 0.86 |
| Ukraine    | 0.07 | 0.19 |
| Uruguay    | 0.49 | 0.43 |
| Uzbekistan | 0.27 | 0.34 |
| Vatican    | 0.89 | 0.85 |
| Venezuela  | 1.00 | 1.00 |
| Vietnam    | 0.83 | 0.78 |
| World      | 1.00 | 1.00 |
| Zambia     | 0.97 | 0.97 |
| Zimbabwe   | 1.00 | 1.00 |

**Table 2:** Results of the unit root tests.
